# Supplementary material for: Deliberative Democracy: Investigating the Longitudinal Impacts of Democratic Activities in Introductory Biology Courses
Source: Oxford University Press journal article supplement (doi:10.1525/abt.2020.82.7.453), 2020-09-01
Supplement: abt_82_7_453_ds001.docx [file abt_82_7_453_ds001.docx]

Supplemental Table 1. List of DD Topics used by non-majors and majors biology courses in 2016-17.

| **Course** | **Course Content** | **DD Topic** | **Real-world Problem/Question** |
| --- | --- | --- | --- |
| *Non-Majors*  *Biology* | Cellular Respiration | High Fructose Corn Syrup (HFCS) versus Sugar | Is HFCS unhealthy enough to warrant government regulation? |
| Patterns of Inheritance | Genetic Testing & Privacy | How much & what type of control the government should have over genetic testing? |
| DNA Technology | Zika Virus & Genetically Modified Mosquitos | Should genetically modified mosquitos be used to combat the Zika virus epidemic? |
| Body Defenses | Vaccines | Should protection of public health or personal freedom be of higher priority to the government? |
| Reproduction & Development | In Vitro Fertilization  (IVF) | Ethics of IVF |
| Ecology | Environmental Policy | Economy versus environment costs/ethics |
| Evolution | Antibiotic Resistance | What are the roles and responsibilities of the government in regulating the use of antibiotics in patient care and in agriculture? |
| Evolution & Diversity | What are the roles and responsibilities of the government in regulating factors which affect biodiversity? |
| Angiosperms | Pesticides | What are the roles and responsibilities of the government in regulating the use of fertilizers and pesticides? |
| *Majors*  *Biology* | Cellular Respiration | High Fructose Corn Syrup versus Sugar | Is HFCS unhealthy enough to warrant government regulation? |
| Cell Cycle | Hela Cells | Ethics and privacy around using human samples |
| Biotechnology | Genetic Engineering (CRISPR/Cas-9) | Ethics of using gene editing on humans |
| Population Evolution | Salmon Populations (Farmed versus Wild) | Should state and federal agencies continue to supplement wild salmon populations with hatchery-reared salmon? |
| Gas Exchange | Coastal Dead Zones | What policies/regulations should be  put in place to decrease the occurrence of coastal dead zones? |
| Chemical Signaling | Endocrine Disrupting Chemicals (EDC) | Should there be regulation on cosmetics that contain EDCs? |
